# Supplementary material for: Smartphone-based digitized recognition of As3+ along with its effectual mitigation in water using a benzothiazole-functionalized molecular scaffold
Source: Royal Society of Chemistry journal article supplement (doi:10.1039/d2ma00309k), 2022-01-01
Supplement: d2ma00309k3.pdf [file d2ma00309k3.pdf]

# Electronic Supporting Information

## Smartphone-based digitized recognition of As<sup>3+</sup> along with its effectual mitigation in water by a benzothiazole functionalized molecular scaffold

SomritaNag,<sup>a,b</sup> AmitaMondal,<sup>a,c</sup> Harish Hirani,<sup>a,d</sup> PriyabrataBanerjee<sup>a,b\*</sup>

---

a. CSIR-Central Mechanical Engineering Research Institute, M. G. Avenue, Durgapur 713209, India. E-mail addresses: [pr\\_banerjee@cmeri.res.in](mailto:pr_banerjee@cmeri.res.in), [Priyabrata\\_banerjee@hotmail.com](mailto:Priyabrata_banerjee@hotmail.com), Webpage: [www.cmeri.res.in](http://www.cmeri.res.in) and [www.priyabratabanerjee.in](http://www.priyabratabanerjee.in)

b. Academy of Scientific and Innovative Research (AcSIR), AcSIR Headquarters CSIR-HRDC Campus, Postal Staff College Area, Sector 19, Kamla Nehru Nagar, Ghaziabad-201002, Uttar Pradesh, India.

c. Department of Chemistry, National Institute of Technology, M. G. Avenue, Durgapur, 713209, India.

d. Mechanical Engineering Department, Indian Institute of Technology Delhi, New Delhi-110016, India.

| Captions             | Contents                                                                                                                                                                                        |
|----------------------|-------------------------------------------------------------------------------------------------------------------------------------------------------------------------------------------------|
| Fig.S1.              | Synthesis of <b>ABH</b>                                                                                                                                                                         |
| Fig.S2.              | ESI-Mass data and HRMS of <b>ABH</b>                                                                                                                                                            |
| Table S1             | Crystallographic data of <b>ABH</b>                                                                                                                                                             |
| Table S2             | Selected bond distances (angstrom) of <b>ABH</b>                                                                                                                                                |
| Table S3             | Selected bond angles (degrees) of <b>ABH</b>                                                                                                                                                    |
| Table S4             | Hydrogen bonding in <b>ABH</b>                                                                                                                                                                  |
| Fig.S3.              | <sup>1</sup> H NMR data of <b>ABH</b> in DMSO-d <sup>6</sup> , 2D-COSY <sup>1</sup> H NMR data of <b>ABH</b> in DMSO-d <sup>6</sup> and <sup>13</sup> CNMR of <b>ABH</b> in DMSO-d <sup>6</sup> |
| Fig.S4.              | Job's plot of <b>ABH</b> with As <sup>3+</sup>                                                                                                                                                  |
| Fig.S5.              | ESI-Mass data of <b>ABH</b> with As <sup>3+</sup>                                                                                                                                               |
| Fig.S6.              | (a) B-H plot of <b>ABH</b> with As <sup>3+</sup> and (b) Ratio of absorbance of <b>ABH</b> with As <sup>3+</sup>                                                                                |
| Fig.S7.              | Plots of Absorbance vs. Time of <b>ABH</b> with As <sup>3+</sup>                                                                                                                                |
| Fig.S8.              | (a) Absorbance spectra of <b>ABH</b> with different cations and (b) Interference of <b>ABH</b> with different cationic analytes in MeOH-H <sub>2</sub> O                                        |
| Fig.S9.              | (a) UV-Vis spectra for Quantitative detection of As <sup>3+</sup> and (b) Schematic representation of phone coupled device fabrication for quantitative detection of As <sup>3+</sup>           |
| Fig.S10.             | Sensing response of <b>ABH</b> after addition of As <sup>3+</sup> at different concentration presented in <b>3D-CAD</b> model                                                                   |
| Fig.S11.             | Fabrication of the logic gate with outputs (Y1 and Y2) upon altering inputs of NAND–NOT–NOR logic functions for <b>ABH</b> with As <sup>3+</sup> and F <sup>-</sup>                             |
| Fig.S12.             | (a) Visual colour change of [ <b>ABH</b> -As <sup>3+</sup> ] adduct with F <sup>-</sup> and other anions and (b) Reversibility <b>ABH</b> with As <sup>3+</sup> & F <sup>-</sup> in MeOH        |
| Fig.S13,<br>Table S5 | Electrochemical response of <b>ABH</b> with As <sup>3+</sup> in MeOH                                                                                                                            |
| Fig.S14.             | FT-IR spectra of <b>ABH</b> in solid state                                                                                                                                                      |
| Fig.S15.             | FT-IR spectra of <b>ABH</b> +As <sup>3+</sup> in solid state                                                                                                                                    |
| Table S6             | Theoretical upshot of <b>ABH</b> :As <sup>3+</sup> interaction                                                                                                                                  |
| Table S7             | Cartesian coordinates of geometry optimized structure of <b>ABH</b>                                                                                                                             |
| Table S8             | Cartesian coordinates of geometry optimized structure of <b>ABH</b> ...As <sup>3+</sup>                                                                                                         |
| Table S9             | 2D-COSY NMR                                                                                                                                                                                     |
| Table S10            | Comparative literature study of <b>ABH</b> with other chemosensors                                                                                                                              |

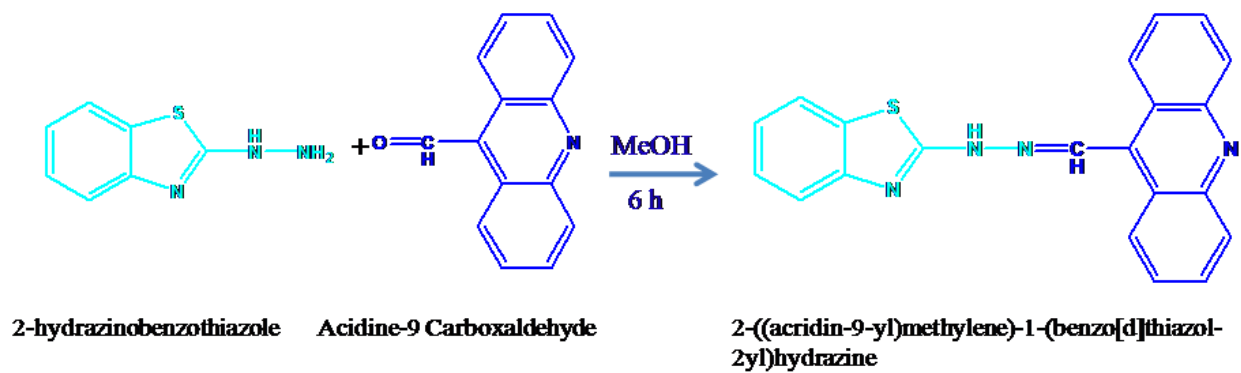

**Fig.S1. Synthesis of ABH**

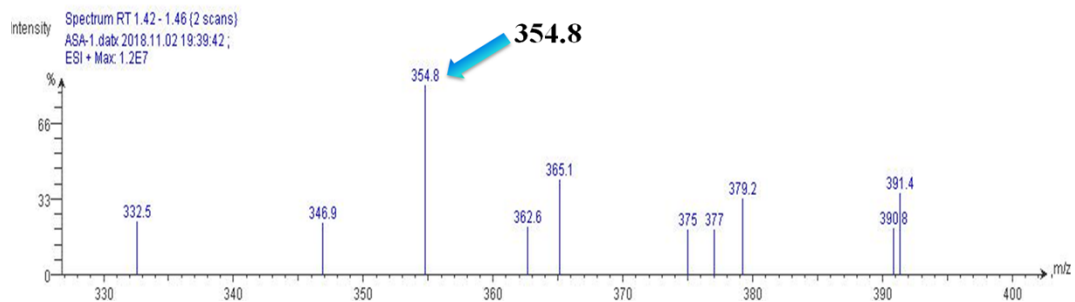

**Fig.S2a. ESI-Mass data of ABH**

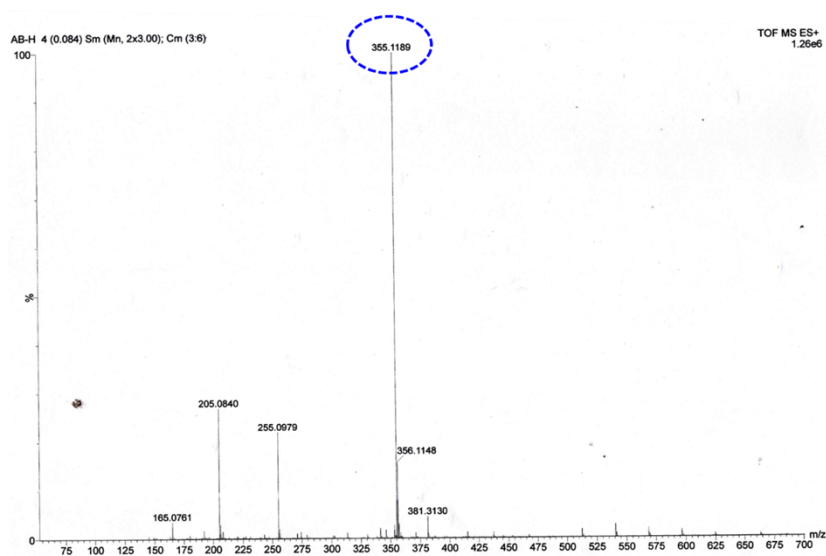

**Fig.S2a. HR-MS data of ABH**

**Table S1** Crystallographic data of **ABH**

| <b>Crystal Data</b>                 |                                                                                               |
|-------------------------------------|-----------------------------------------------------------------------------------------------|
| Formula                             | C <sub>21</sub> H <sub>14</sub> N <sub>4</sub> S                                              |
| Formula Weight                      | 354.42                                                                                        |
| Crystal System                      | monoclinic                                                                                    |
| Space group                         | C2/c (No.15)                                                                                  |
| a, b, c [Angstrom]                  | 27.201(7) 3.9233(10) 37.778(9)                                                                |
| alpha, beta, gamma [deg]            | 90 107.480(8) 90                                                                              |
| V [Ang**3]                          | 3845.4(17)                                                                                    |
| Z                                   | 8                                                                                             |
| D(calc) [g/cm**3]                   | 1.224                                                                                         |
| Mu(MoKa) [ /mm ]                    | 0.179                                                                                         |
| F(000)                              | 1472                                                                                          |
| Crystal Size [mm]                   | 0.10 x 0.11 x 0.12                                                                            |
| <b>Data Collection</b>              |                                                                                               |
| Temperature (K)                     | 129                                                                                           |
| Radiation [Angstrom]                | MoKa 0.71073                                                                                  |
| Theta Min-Max [Deg]                 | 2.3, 25.0                                                                                     |
| Dataset                             | -32: 32 ; -4: 4 ; -44: 44                                                                     |
| Tot., Uniq. Data, R(int)            | 13614, 3386, 0.102                                                                            |
| Observed Data [I > 2.0 sigma(I)]    | 2179                                                                                          |
| <b>Refinement</b>                   |                                                                                               |
| Nref, Npar                          | 3386, 235                                                                                     |
| R, wR2, S                           | 0.0792, 0.1916, 1.03                                                                          |
| w =                                 | $\frac{1}{\sigma^2(F_o^2) + (0.0758P)^2 + 7.7249P}$ WHERE<br>$P = \frac{(F_o^2 + 2F_c^2)}{3}$ |
| Max. and Av. Shift/Error            | 0.00, 0.00                                                                                    |
| Min. and Max. Resd. Dens. [e/Ang^3] | -0.30, 0.29                                                                                   |

**Table S2** Selected bond distances (angstrom) of **ABH**

|      |       |          |      |       |          |
|------|-------|----------|------|-------|----------|
| S001 | -C009 | 1.752(5) | C00F | -C00N | 1.432(6) |
| S001 | -C00A | 1.745(4) | C00G | -C00H | 1.427(7) |
| N002 | -C005 | 1.399(5) | C00H | -C00O | 1.362(8) |
| N002 | -C009 | 1.288(6) | C00I | -C00L | 1.369(7) |
| N003 | -N004 | 1.353(5) | C00J | -C00M | 1.399(8) |
| N003 | -C00D | 1.284(5) | C00K | -C00M | 1.374(7) |
| N004 | -C009 | 1.360(5) | C00L | -C00O | 1.394(8) |
| N006 | -C00F | 1.348(7) | C00N | -C00Q | 1.347(8) |
| N006 | -C00G | 1.363(6) | C00P | -C00Q | 1.399(7) |
| C005 | -C00A | 1.392(7) | C00C | -H00C | 0.9500   |
| C005 | -C00C | 1.389(6) | C00D | -H00D | 0.9500   |
| C007 | -C00B | 1.426(6) | C00E | -H00E | 0.9500   |
| C007 | -C00E | 1.441(7) | C00H | -H00H | 0.9500   |
| C007 | -C00F | 1.427(6) | C00I | -H00I | 0.9500   |
| C008 | -C00B | 1.422(6) | C00J | -H00J | 0.9500   |
| C008 | -C00G | 1.422(6) | C00K | -H00K | 0.9500   |
| C008 | -C00I | 1.424(6) | C00L | -H00L | 0.9500   |
| N004 | -H004 | 0.8800   | C00M | -H00M | 0.9500   |
| C00A | -C00K | 1.391(6) | C00N | -H00N | 0.9500   |
| C00B | -C00D | 1.460(6) | C00O | -H00O | 0.9500   |
| C00C | -C00J | 1.378(7) | C00P | -H00P | 0.9500   |
| C00E | -C00P | 1.348(6) | C00Q | -H00Q | 0.9500   |

**Table S3** Selected bond angles (degrees) of **ABH**

|      |       |       |          |      |       |       |          |
|------|-------|-------|----------|------|-------|-------|----------|
| C009 | -S001 | -C00A | 87.7(2)  | N006 | -C00F | -C007 | 123.5(4) |
| C005 | -N002 | -C009 | 109.6(4) | C007 | -C00F | -C00N | 120.0(4) |
| N004 | -N003 | -C00D | 116.6(4) | N006 | -C00F | -C00N | 116.6(4) |
| N003 | -N004 | -C009 | 118.2(4) | N006 | -C00G | -C00H | 115.5(4) |
| C00F | -N006 | -C00G | 117.3(4) | C008 | -C00G | -C00H | 120.1(4) |
| N002 | -C005 | -C00A | 115.1(4) | N006 | -C00G | -C008 | 124.4(4) |
| N002 | -C005 | -C00C | 125.4(4) | C00G | -C00H | -C00O | 120.4(5) |
| C00A | -C005 | -C00C | 119.5(4) | C008 | -C00I | -C00L | 119.5(4) |
| C00B | -C007 | -C00E | 124.9(4) | C00C | -C00J | -C00M | 120.3(4) |
| C00B | -C007 | -C00F | 118.7(4) | C00A | -C00K | -C00M | 118.4(5) |
| C00E | -C007 | -C00F | 116.4(4) | C00I | -C00L | -C00O | 123.0(5) |
| C00B | -C008 | -C00G | 117.8(4) | C00J | -C00M | -C00K | 120.9(5) |
| C00B | -C008 | -C00I | 124.3(4) | C00F | -C00N | -C00Q | 120.2(5) |
| C00G | -C008 | -C00I | 117.9(4) | C00H | -C00O | -C00L | 119.2(5) |
| C009 | -N004 | -H004 | 121.00   | C00E | -C00P | -C00Q | 121.2(5) |
| N003 | -N004 | -H004 | 121.00   | C00N | -C00Q | -C00P | 120.7(5) |
| S001 | -C009 | -N004 | 119.3(3) | C005 | -C00C | -H00C | 120.00   |
| N002 | -C009 | -N004 | 123.2(4) | C00J | -C00C | -H00C | 120.00   |
| S001 | -C009 | -N002 | 117.6(3) | N003 | -C00D | -H00D | 118.00   |
| C005 | -C00A | -C00K | 121.3(4) | C00B | -C00D | -H00D | 118.00   |
| S001 | -C00A | -C005 | 110.0(3) | C007 | -C00E | -H00E | 119.00   |
| S001 | -C00A | -C00K | 128.6(4) | C00P | -C00E | -H00E | 119.00   |
| C008 | -C00B | -C00D | 124.3(4) | C00G | -C00H | -H00H | 120.00   |
| C007 | -C00B | -C008 | 118.2(4) | C00O | -C00H | -H00H | 120.00   |



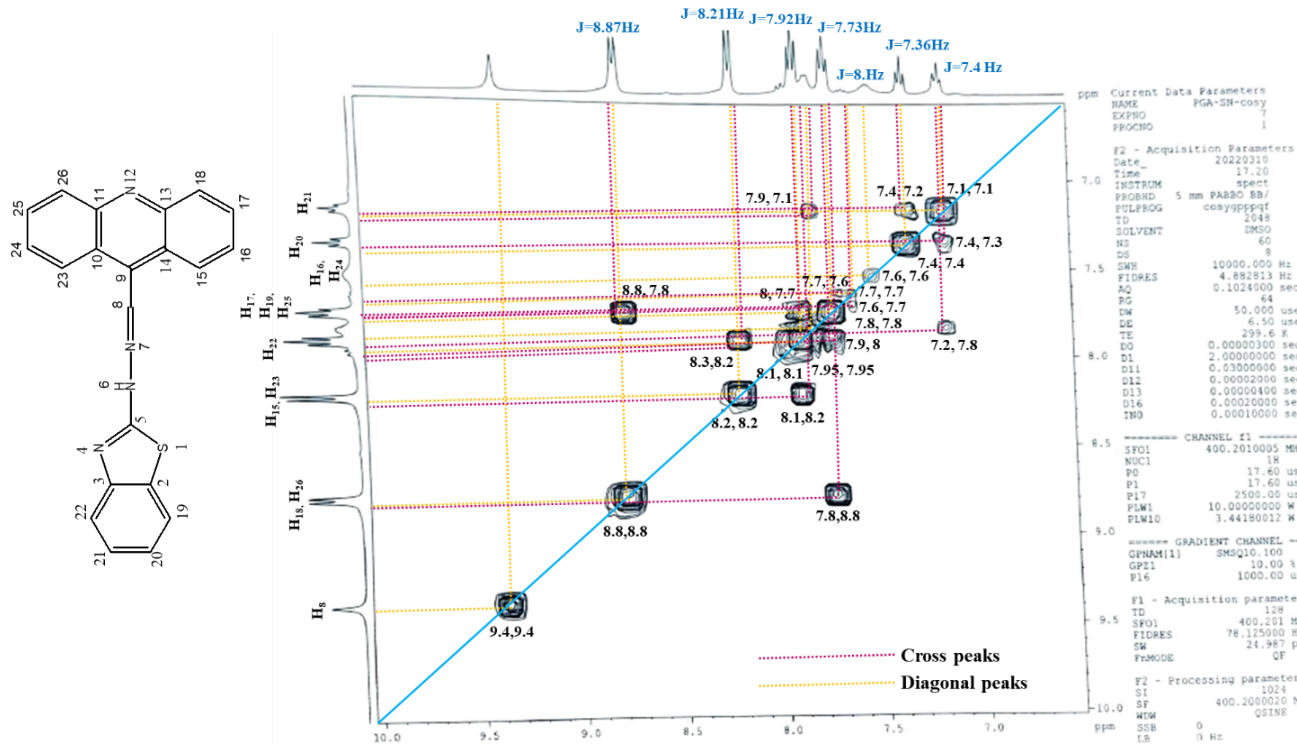

Fig.S3b. <sup>1</sup>H NMR-2D-COSY of ABH in DMSO-d<sub>6</sub>

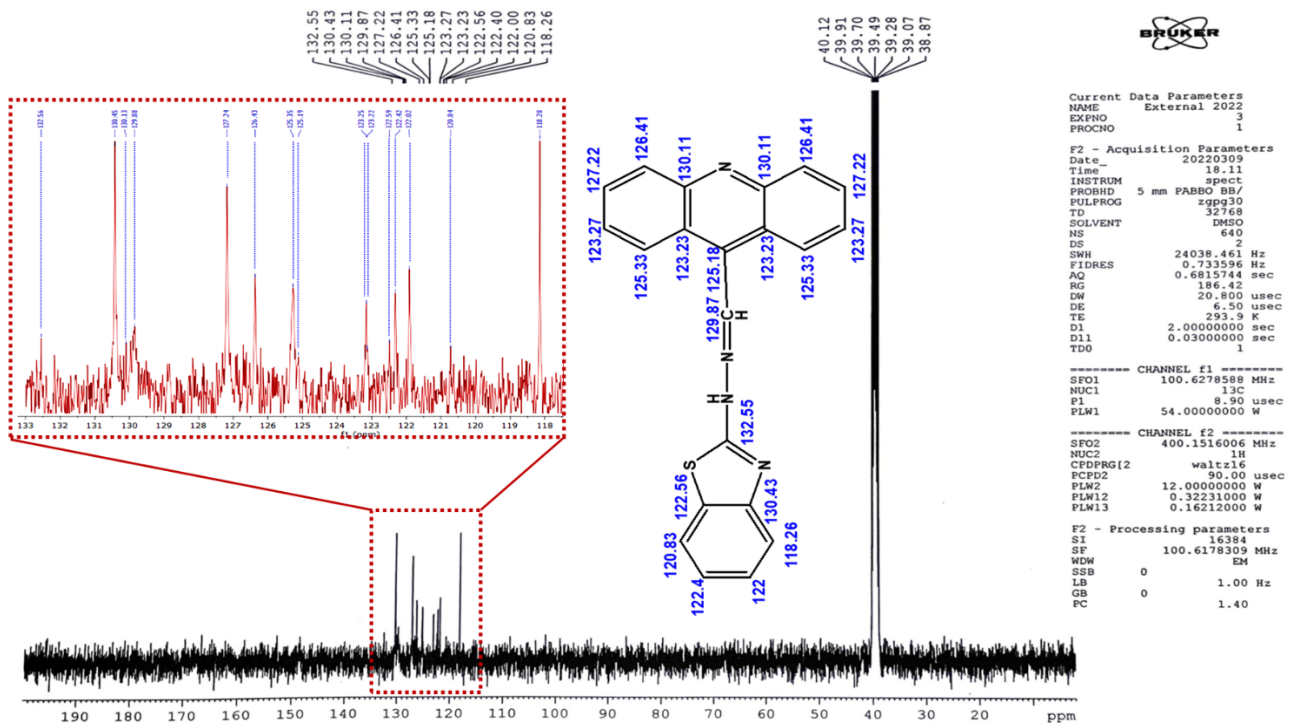

Fig.S3c. <sup>13</sup>C NMR of ABH in DMSO-d<sub>6</sub>



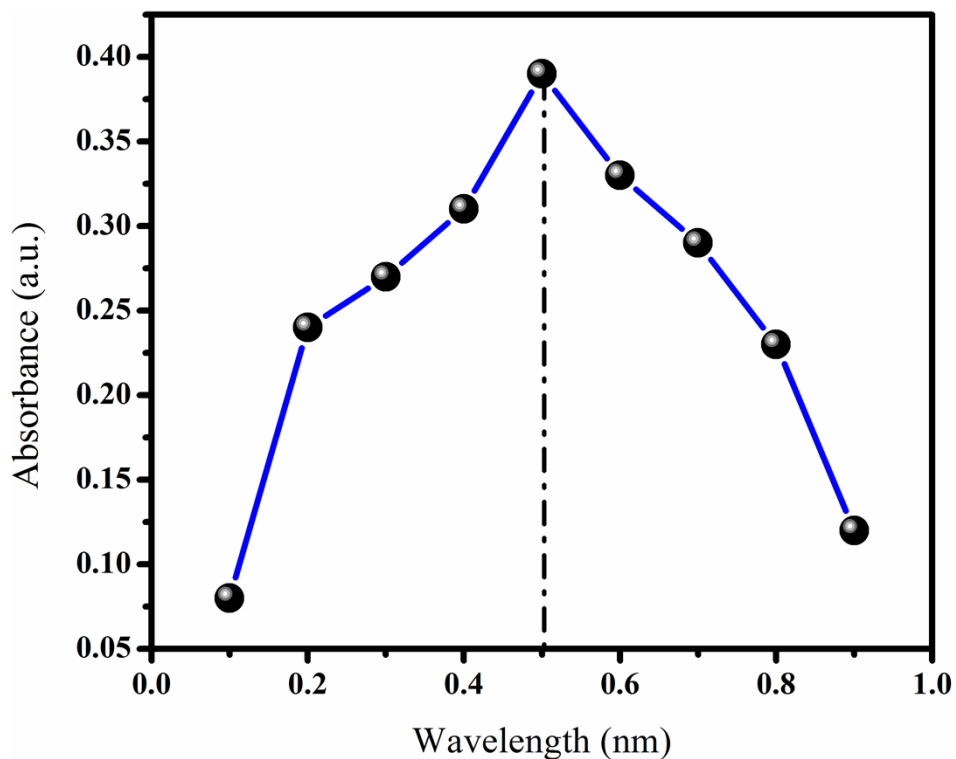

Fig.S4. Job's plot of ABH with As<sup>+3</sup>

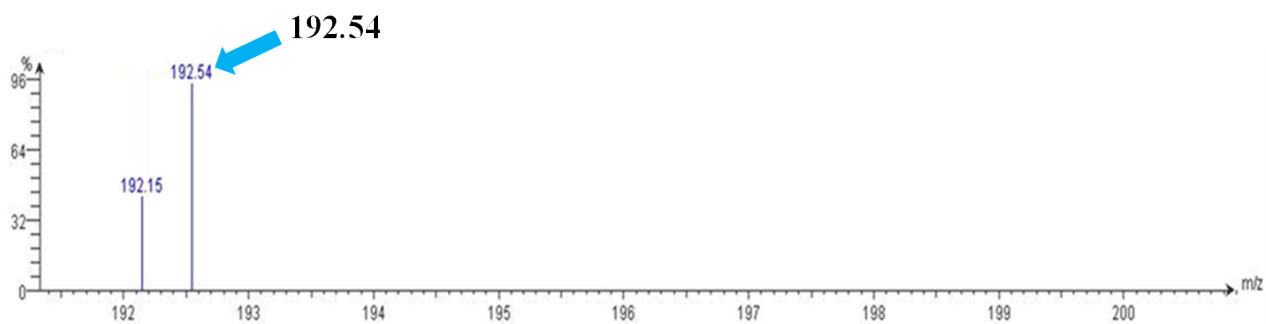

Fig.S5. ESI-Mass data of ABH with As<sup>+3</sup>

### Benesi-Hildebrand Equation and Plot

The association constant of a complex formed in between the host molecule and the incoming Metal ion has been determined from the following equilibrium.

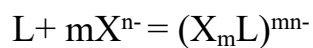

$$\frac{(X_mL)^{mn-}}{[L][X^{n-}]^m} = k$$

For 1:1 type complex formation with m=1 following the Benesi-Hildebrand relation, can be expressed in terms of optical density (A) as follows:

$$A = \frac{A_0 + A_1K[X^{n-}]}{1 + K[X^{n-}]}$$

$$\frac{1}{A - A_0} = \frac{1}{A_1 - A_0} + \frac{1}{A_1 - A_0} k [X^{n-}]$$

Where  $[X^{n-}]$ ,  $[L]$  and  $[(X_mL)^{mn-}]$  are the concentration of the added anions (Here,  $As^{+3}$ ), host molecule/receptor (here ABH) and the complexation between anions and receptors, respectively.  $A_0$ ,  $A$  and  $A_1$  indicates the optical density or absorbance at a particular wavelength of receptor 1 or receptor 2 without adding any anion, absorbance after adding anion at every successive step and excess amount of added anion, respectively. The binding constant or association constant  $K$  ( $M^{-1}$  or  $M^{-2}$ ) is determined from the ratio of intercept and slope of Benesi-Hildebrand plot of optical density.

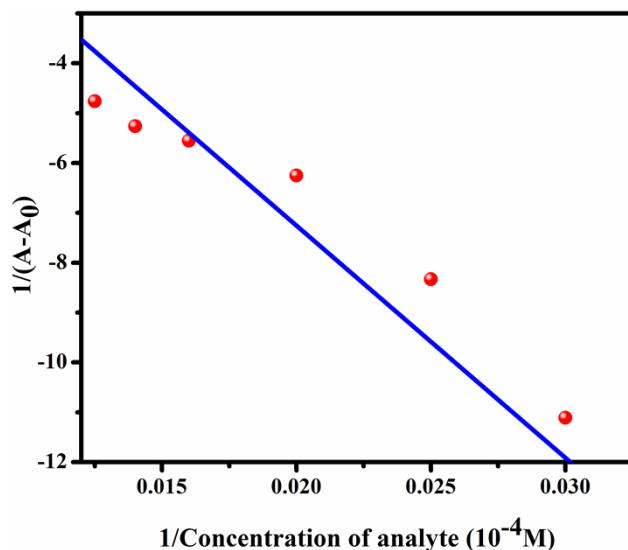

**Fig.S6(a). B-H plot of ABH with As<sup>3</sup>**

**Detection limit calculation**

The detection limit (DL) has been calculated following UV-Vis titration. The absorbance spectrum of ABH was repeated for 5 times, and its standard deviation is measured. The limit of detection (LOD) is calculated from the following formula:  $DL = 3\sigma/k$ ;  $\sigma$  is the standard deviation of the blank solution of ABH. Gradual emergence of new absorbance values during colorimetric titration with targeted analytes is plotted against its concentration. The slope (k) is derived from these plots.

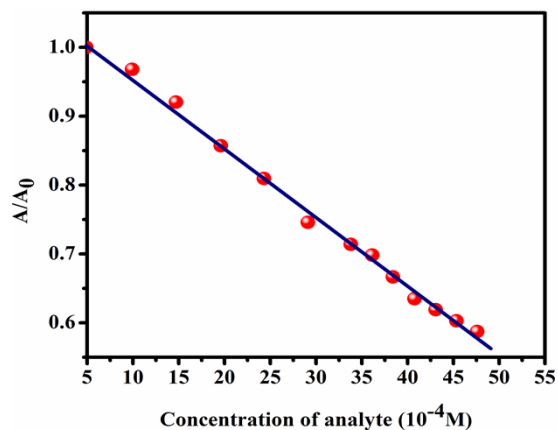

**Fig.S6(b).Ratio of absorbance of ABH with As<sup>3</sup>**

### Rate constant calculation

Rate constant of the host-guest interaction was calculated from UV-Vis spectroscopy. The sensor and the analytes were taken in similar concentration and the plots of absorbance vs. time were observed in a fixed wavelength. After those three graphs were plotted (i) Absorbance vs. time, (ii) ln Absorbance vs. time and (iii) 1/Absorbance vs. time. Among the three plots, the plot in which the R value is more closed to 1 is chosen and accordingly the order of the reaction was known. Furthermore, the reaction rate was obtained from the slope of the specific plot.

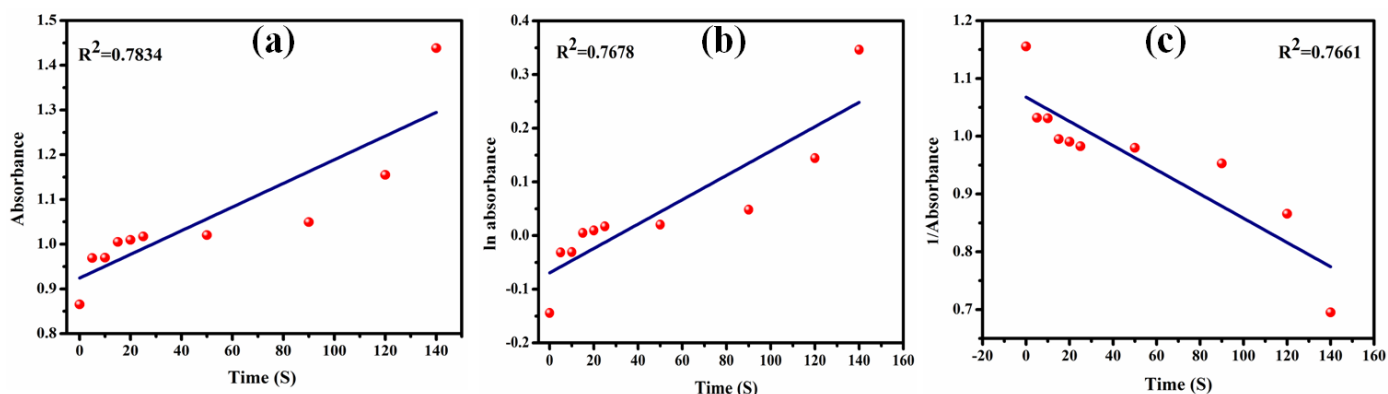

Fig.S7. Plots of Absorbance vs. Time of ABH with  $As^{+3}$

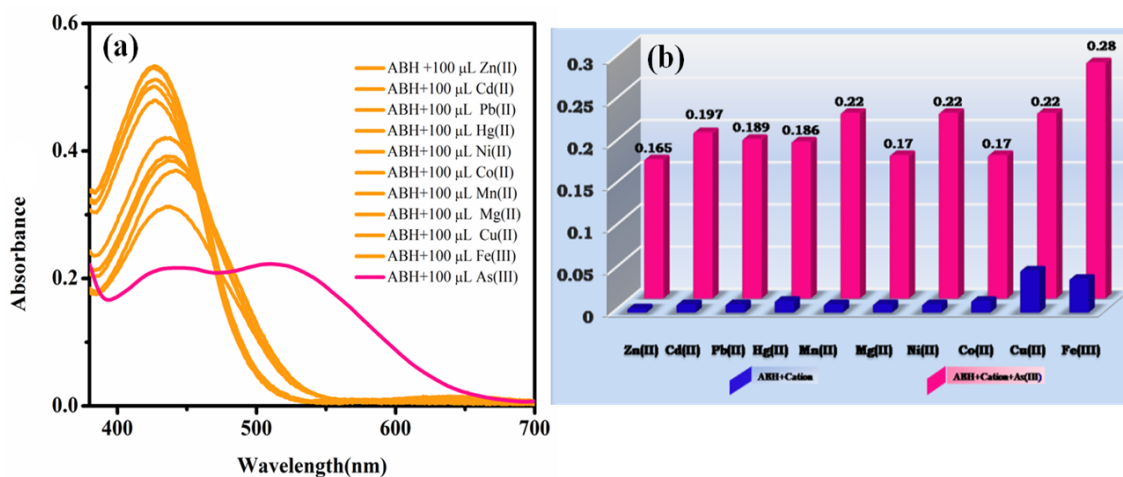

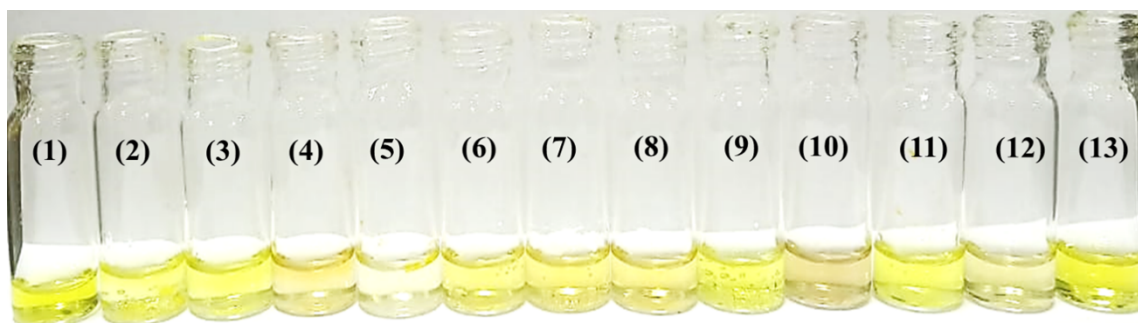

**Fig.S8. (a) Absorbance spectra of ABH with different cations, (b) Interference of ABH with different cationic analytes in MeOH-H<sub>2</sub>O and (c) Visual colorimetric response of ABH (10<sup>-4</sup>M) in methanol in existence of varying cations (10<sup>-4</sup>M) in aqueous medium. [Vial 1. ABH (blank), 2. ABH+La<sup>3+</sup>, 3. ABH+Nd<sup>3+</sup>, 4. ABH+Gd<sup>3+</sup>, 5. ABH +Sb<sup>3+</sup>,6. ABH + Sm<sup>3+</sup>, 7. ABH +Al<sup>3+</sup>, 8. ABH +Cr<sup>3+</sup>, 9. ABH +Mg<sup>2+</sup>, 10. ABH +Au<sup>3+</sup>, 11. ABH +Fe<sup>3+</sup>, 12. ABH +Bi<sup>3+</sup>, 13. ABH +Ca<sup>2+</sup>].**

#### Quantitative detection of As<sup>+3</sup> in terms of RGB values

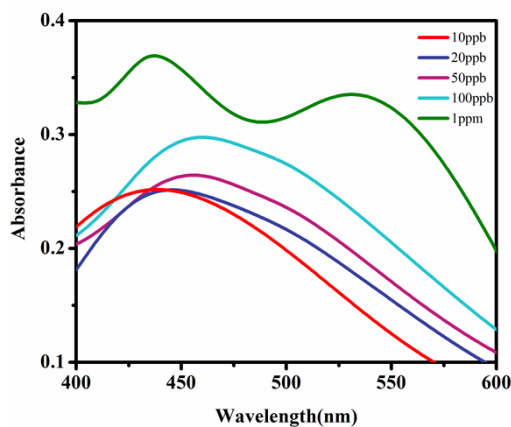

**Fig.S9(a). UV-Vis spectra for Quantitative detection of As<sup>+3</sup> in terms of RGB values**

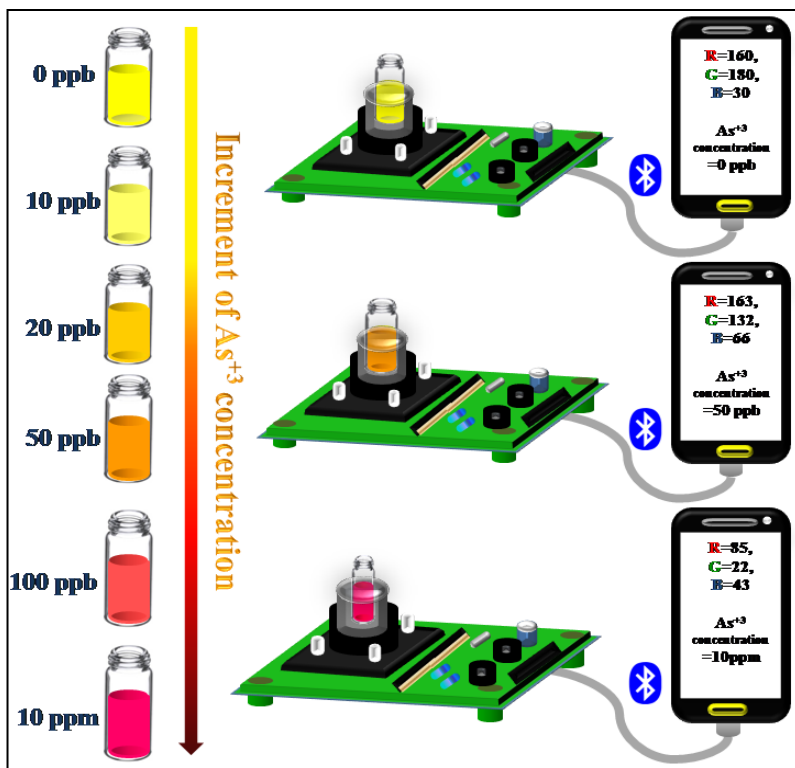

Fig.S9(b).Schematic representation of phone coupled device fabrication for quantitative detection of As<sup>3+</sup>

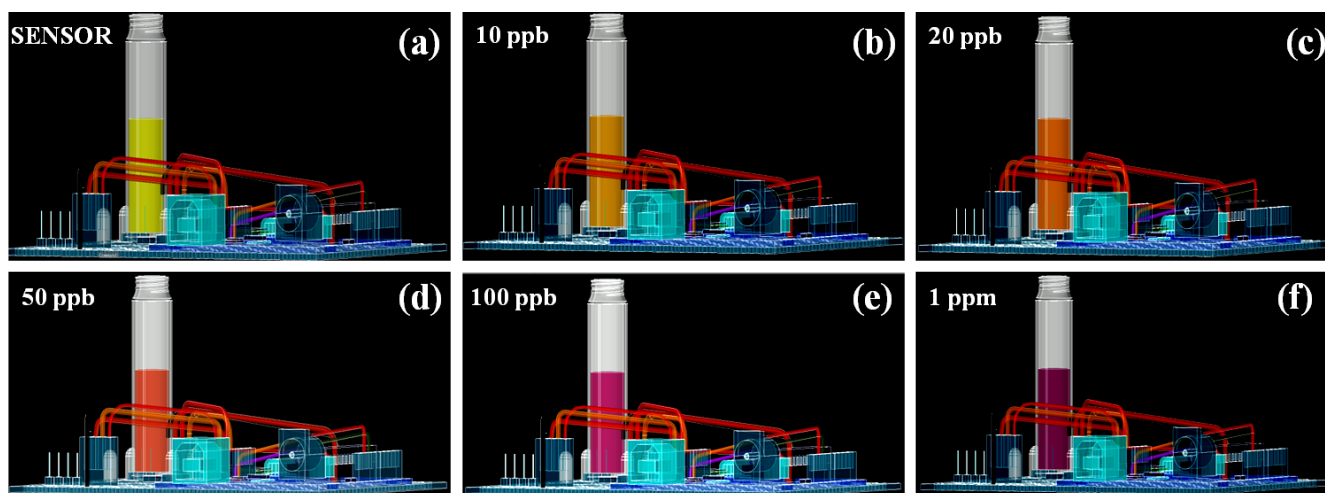

Fig.S10.(a-f).Sensing response of ABH after addition of As<sup>3+</sup> at different concentration presented in 3D-CAD model

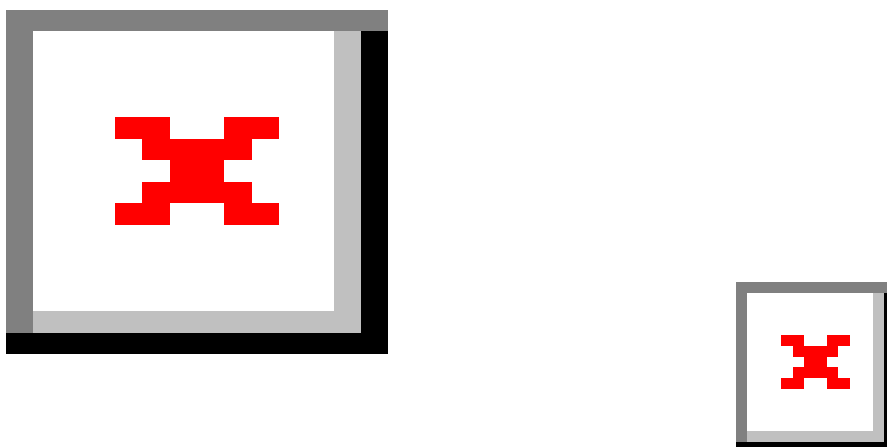

**Fig.S11. Fabrication of the logic gate with outputs (Y1 and Y2) upon altering inputs of NAND–NOT–NOR logic functions for ABH with  $\text{As}^{+3}$  and  $\text{F}^-$**

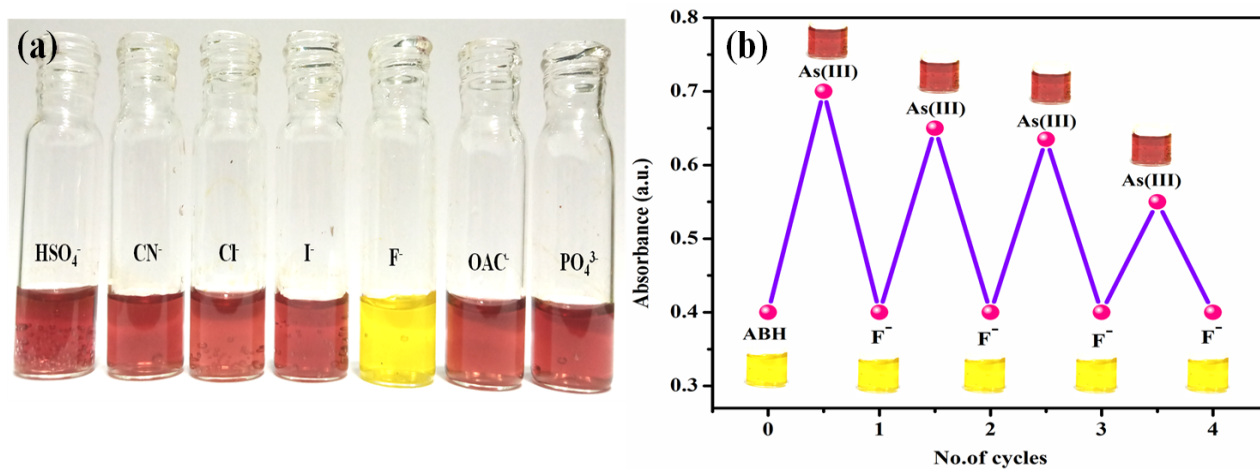

**Fig.S12.(a) Visual colour change of [ABH-As<sup>3+</sup>] adduct with F<sup>-</sup> and other anions and (b) Reversibility ABH with As<sup>3+</sup> & F<sup>-</sup> in MeOH**

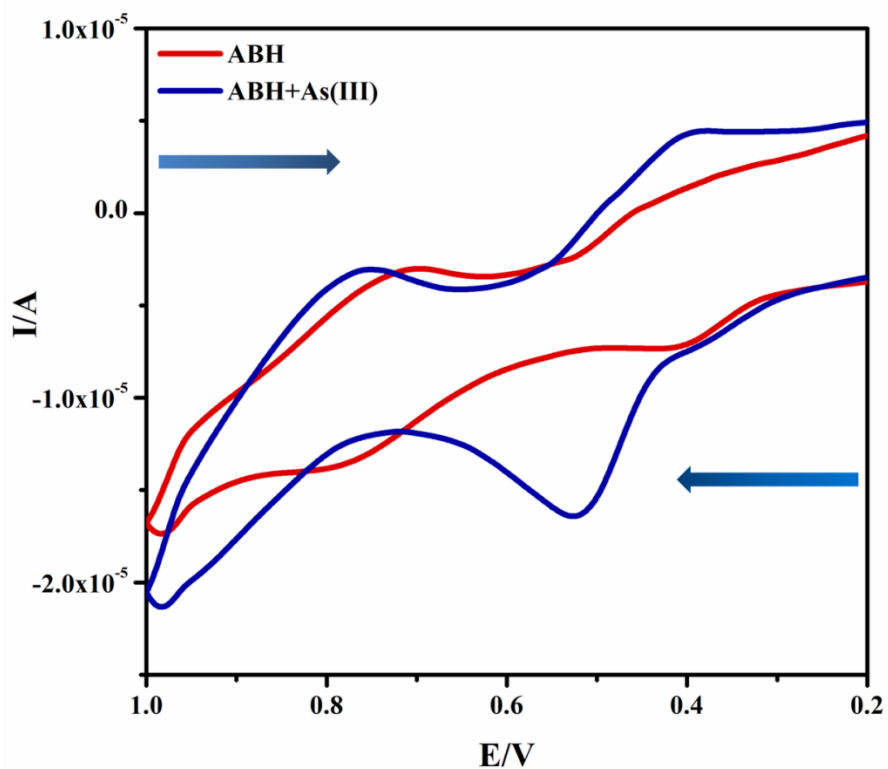

Fig.S13. Electrochemical response of ABH with  $\text{As}^{+3}$  in MeOH

Table S5 Oxidation Reduction Potential (ORP) of ABH with  $\text{As}^{3+}$

|                  | ABH                                                                                                                                     | ABH+(As(III))                                                                                                                         |
|------------------|-----------------------------------------------------------------------------------------------------------------------------------------|---------------------------------------------------------------------------------------------------------------------------------------|
| <b>Reduction</b> | $E_c = 0.167 \text{ V}$<br>$I_c = 4.43 \times 10^{-6} \text{ A}$                                                                        | $E_c = 0.1097 \text{ V}$<br>$I_c = 5.6 \times 10^{-6} \text{ A}$<br>$E_c = 0.3915 \text{ V}$<br>$I_c = 4.43 \times 10^{-6} \text{ A}$ |
| <b>Oxidation</b> | $E_a = 0.413 \text{ V}$<br>$I_a = -7.395 \times 10^{-6} \text{ A}$<br>$E_a = 0.775 \text{ V}$<br>$I_a = -1.36 \times 10^{-5} \text{ A}$ | $E_a = 0.519 \text{ V}$<br>$I_a = -1.645 \times 10^{-5} \text{ A}$                                                                    |



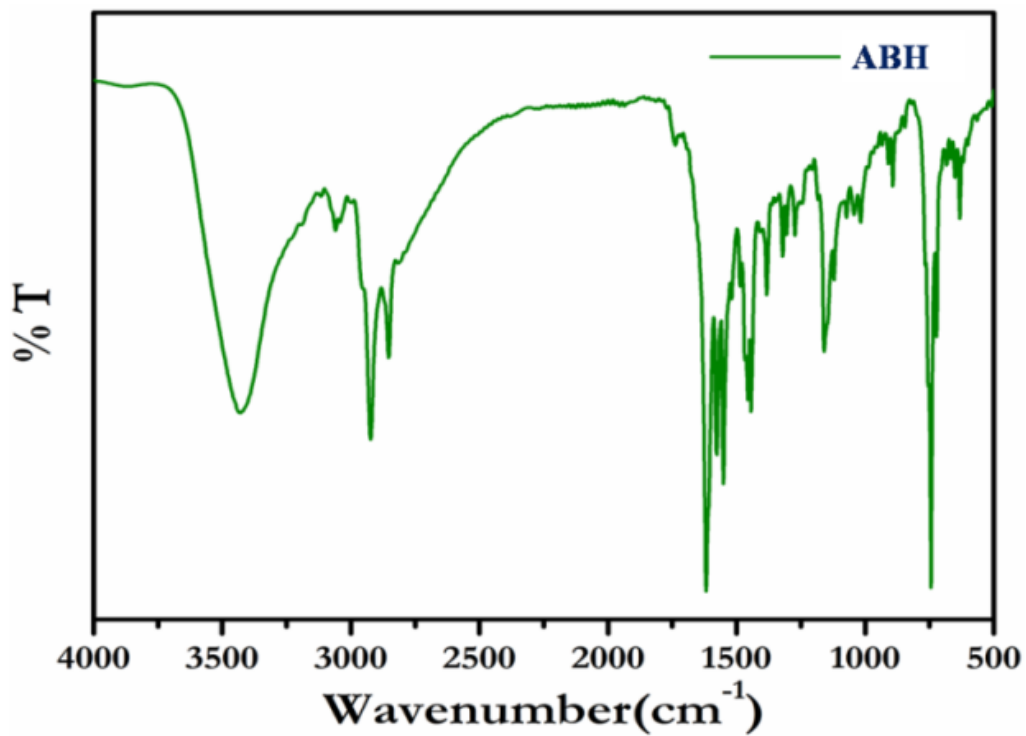

Fig.S14.FT-IR spectra of ABH in solid state

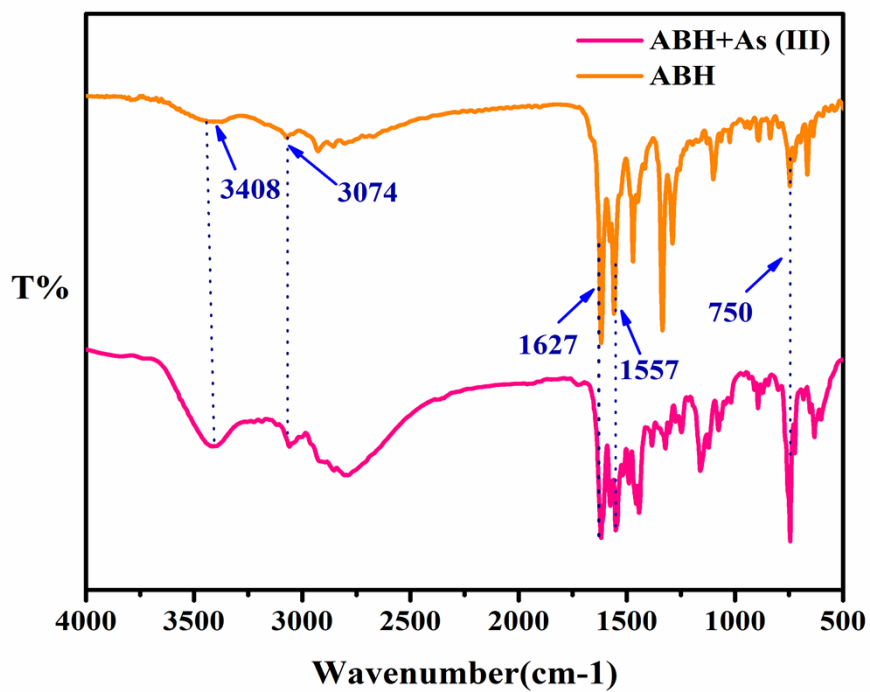

Fig.S15.Infrared spectra of ABH and ABH-As<sup>3+</sup> adduct

**Table S6 Cartesian coordinates of geometry optimized structure of ABH**

| ATOM |   | CARTESIAN COORDINATES |                   |                   |
|------|---|-----------------------|-------------------|-------------------|
| 1    | s | 2.83249083809797      | 6.35239167139706  | 53.68841459530811 |
| 2    | n | 7.72335778985233      | 7.22991852380237  | 54.04721129502077 |
| 3    | n | 4.58266104411116      | 4.97026569152620  | 48.55954499870300 |
| 4    | n | 6.45756741231293      | 5.73378159685362  | 50.07263211764133 |
| 5    | h | 8.28774316079637      | 5.83184058129339  | 49.44698007151653 |
| 6    | c | 6.69483685459454      | 7.82628697525408  | 56.37947093054547 |
| 7    | n | -0.19180750592023     | 1.91579036082574  | 40.56696559385734 |
| 8    | c | 3.77426421839044      | 3.96768256791613  | 41.79038649514436 |
| 9    | c | 0.99725677905627      | 2.20038358841659  | 45.04520409640357 |
| 10   | c | 5.98072173428171      | 6.45599880286384  | 52.50695867909901 |
| 11   | c | 4.04174107216890      | 7.47865338186203  | 56.59114661193276 |
| 12   | c | 3.26404071313271      | 3.50786876674106  | 44.39845683149521 |
| 13   | c | 8.05177624741146      | 8.72034950264778  | 58.48133185117346 |
| 14   | h | 10.09467371479806     | 8.99316038323325  | 58.33201500253100 |
| 15   | c | 5.13088209917040      | 4.36660415583063  | 46.26220336563216 |
| 16   | h | 7.10389880742531      | 4.52555947569518  | 45.62480141375521 |
| 17   | c | 5.96179587007520      | 5.28600665330664  | 40.87937743155627 |
| 18   | h | 7.35339741776671      | 6.02871866526746  | 42.20650063075953 |
| 19   | c | 1.95541397428020      | 3.10233751186541  | 39.93886303952723 |
| 20   | c | -0.68481469205300     | 1.46499317239521  | 43.01131693730174 |
| 21   | c | -2.99348565982272     | 0.17172843830957  | 43.60039360292753 |
| 22   | h | -4.21984203339087     | -0.33158080679869 | 42.01563406351338 |
| 23   | c | 0.29149959917756      | 1.50443644305146  | 47.56695426855312 |
| 24   | h | 1.54430480360085      | 1.98680171266369  | 49.12481542626210 |
| 25   | c | 6.75896436619150      | 9.24230386076756  | 60.72150003248360 |
| 26   | h | 7.80647766585539      | 9.93884573610342  | 62.36318295885189 |
| 27   | c | 2.74229814309555      | 7.99825924955462  | 58.83053464466169 |
| 28   | h | 0.69909134786697      | 7.72109178942812  | 58.97084148380559 |
| 29   | c | -1.92956631857728     | 0.24026724436917  | 48.05035732097197 |
| 30   | h | -2.41006341896557     | -0.27751973820650 | 49.99395063598764 |
| 31   | c | 4.12954277766502      | 8.88534924166400  | 60.90015265142744 |
| 32   | h | 3.15256974932870      | 9.30372958337993  | 62.67405834476605 |
| 33   | c | 2.43006196553968      | 3.54022714545885  | 37.30586751678629 |
| 34   | h | 1.01636222398748      | 2.85018401735857  | 35.96653861887386 |
| 35   | c | -3.60980781417536     | -0.41715949431923 | 46.04963620106586 |
| 36   | h | -5.37283749728763     | -1.41103876468477 | 46.47549311366430 |
| 37   | c | 6.34865796586905      | 5.67152261725592  | 38.33728594846797 |
| 38   | h | 8.03688021722704      | 6.68118059988607  | 37.70055772260300 |
| 39   | c | 4.56771021484423      | 4.78143924644129  | 36.52097186870897 |
| 40   | h | 4.91028639025913      | 5.10577659017523  | 34.50745635295921 |

**Table S7 Cartesian coordinates of geometry optimized structure of ABH...As<sup>3+</sup>**

| ATOM  | CARTESIAN COORDINATES |                    |                   |
|-------|-----------------------|--------------------|-------------------|
| 1 s   | 2.35175714364505      | 9.11149722087440   | 52.34282993126935 |
| 2 n   | 6.00214591658226      | 5.85633817333158   | 52.69108095400421 |
| 3 n   | 5.12016231127147      | 3.00785348328953   | 48.92925926722882 |
| 4 n   | 3.57557750043754      | 5.07478130991938   | 49.22592178570424 |
| 5 c   | 6.35577052293782      | 7.44606065797380   | 54.77649400735772 |
| 6 n   | -0.95228035831601     | 1.51251553898199   | 41.31051021636333 |
| 7 c   | 2.56234408347991      | 3.57387797937587   | 43.51177996702752 |
| 8 c   | 1.21099854453412      | -0.67418419747784  | 44.76731365133171 |
| 9 c   | 4.02390541972394      | 6.49528017901022   | 51.30117725639400 |
| 10 c  | 4.50728984414559      | 9.36149191524143   | 54.89255811853522 |
| 11 c  | 2.80797595381760      | 1.45435192475079   | 45.14715864181262 |
| 12 c  | 8.24925804538686      | 7.27765858148470   | 56.61190739120907 |
| 13 c  | 4.72177060123413      | 1.32711453287003   | 47.14031148288026 |
| 14 c  | 4.22070897560514      | 5.71251060447650   | 43.54030257457010 |
| 15 c  | 0.57783861671163      | 3.50387040178166   | 41.62612041304936 |
| 16 c  | -0.65729835488984     | -0.53399129645859  | 42.77542525789239 |
| 17 c  | -2.29212563053160     | -2.65307239355026  | 42.35887207842038 |
| 18 c  | 1.31067151186952      | -2.91193341347544  | 46.28045319103641 |
| 19 c  | 8.24636589203199      | 9.06022056872397   | 58.55618315401242 |
| 20 c  | 4.50413780965660      | 11.14438846612621  | 56.83751553854261 |
| 21 c  | -0.28755112240626     | -4.91001889399090  | 45.81319134338853 |
| 22 c  | 6.39945311333293      | 10.96871689508188  | 58.66888808627577 |
| 23 c  | 0.25627594277018      | 5.63318305036791   | 39.98025908824744 |
| 24 c  | -2.10659317428215     | -4.78467414716273  | 43.82706735728953 |
| 25 c  | 3.86449320963175      | 7.70374959504811   | 41.90695746450780 |
| 26 c  | 1.84118216273957      | 7.68120473319256   | 40.12477707461763 |
| 27 as | 7.87339980704549      | 2.94709535667732   | 51.43499724695475 |
| 28 h  | 1.92551689768065      | 5.13795925850792   | 48.23072197292947 |
| 29 h  | 9.68555918616333      | 5.79452821796665   | 56.53049919147805 |
| 30 h  | 5.94400111199733      | -0.33510342500731  | 47.27582600827787 |
| 31 h  | 5.82498252649015      | 5.75212902164851   | 44.83951747026612 |
| 32 h  | -3.67927540463676     | -2.49362769741946  | 40.83692369783858 |
| 33 h  | 2.65668187591522      | -3.03682162122623  | 47.84133299314600 |
| 34 h  | 9.70747597855408      | 8.96442462712499   | 60.01418610609397 |
| 35 h  | 3.06993304446478      | 12.62717684037198  | 56.92845027885223 |
| 36 h  | -0.17680893202007     | -6.60974191874781  | 46.98487623122993 |
| 37 h  | 6.44037922600826      | 12.34114352686781  | 60.21316100829977 |
| 38 h  | -1.27556041426524     | 5.53486021898886   | 38.59815406271444 |
| 39 h  | -3.36210142002085     | -6.39320187825166  | 43.49291337877192 |
| 40 h  | 5.16063822205379      | 9.31356580090942   | 41.95531565967185 |
| 41 h  | 1.58665067199842      | 9.29045151704256   | 38.85180559710409 |
| 42 i  | 9.06128256234929      | -13.50936465425681 | 69.72396019186904 |
| 43 i  | 10.76118288399203     | -14.37838144985135 | 75.08443255905078 |
| 44 i  | 7.35860872676249      | -12.63862912802591 | 64.35234153677563 |

**Table S8** Loewdin population analysis plot

|      | <b>Loewdin atomic charges of ABH</b> | <b>Loewdin atomic charges of ABH...As<sup>3+</sup></b> |
|------|--------------------------------------|--------------------------------------------------------|
| 1s   | 0.139                                | 0.363                                                  |
| 2n   | -0.143                               | 0.3962                                                 |
| 3n   | -0.154                               | 0.3507                                                 |
| 4n   | -0.0206                              | -0.083                                                 |
| 5c   | -0.09                                | 0.01859                                                |
| 6n   | -0.027                               | -0.04619                                               |
| 7c   | -0.024                               | -0.0099                                                |
| 8c   | -0.045                               | -0.00323                                               |
| 9c   | 0.008                                | 0.03573                                                |
| 10c  | -0.201                               | -0.08420                                               |
| 11c  | -0.1745                              | 0.01247                                                |
| 12c  | -0.1829                              | -0.1728                                                |
| 13c  | -0.00106                             | -0.00529                                               |
| 14c  | -0.00052                             | -0.1644                                                |
| 15c  | -0.18619                             | 0.0130                                                 |
| 16c  | -0.18440                             | 0.01677                                                |
| 17c  | -0.18359                             | -0.1225                                                |
| 18c  | -0.19027                             | -0.1515                                                |
| 19c  | -0.18275                             | -0.1469                                                |
| 20c  | -0.193                               | -0.15606                                               |
| 21c  | -0.182                               | -0.12327                                               |
| 22c  | -0.1753                              | -0.15226                                               |
| 23c  | -0.1753                              | -0.13272                                               |
| 24c  | -0.177                               | -0.13836                                               |
| 27As | -                                    | -0.707                                                 |
| 28i  | -                                    | 1                                                      |

|     |   |        |
|-----|---|--------|
| 29i | - | 0.9    |
| 30i | - | 0.2939 |

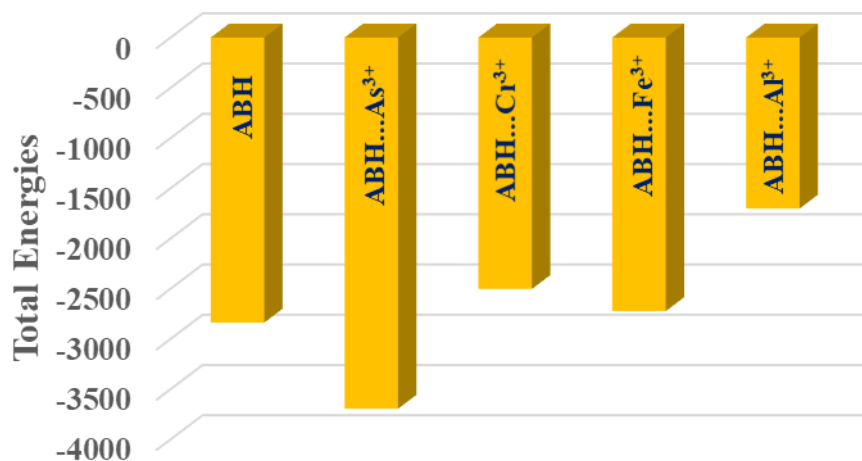

**Fig.S16.**Interaction of **ABH** with lethal interfering trivalent cations

**Table S9** 2D-COSY analysis of **ABH**

| <sup>1</sup> H- <sup>1</sup> H diagonal peak (ppm) | <sup>1</sup> H- <sup>1</sup> H cross peak (ppm) |
|----------------------------------------------------|-------------------------------------------------|
| 9.4-9.4                                            | 7.8-8.8                                         |
| 8.8-8.8                                            | 8.1-8.2                                         |
| 8.2-8.2                                            | 8.8-7.8                                         |
| 8.1-8.1                                            | 8.3-8.2                                         |
| 7.95-7.95                                          | 7.9-8                                           |
| 7.8-7.8                                            | 7.2-7.8                                         |
| 7.7-7.7                                            | 7.6-7.7                                         |
| 7.6-7.6                                            | 7.4-7.3                                         |
| 7.4-7.4                                            | 7.2-7.4                                         |
| 7.1-7.1                                            | 7.9-7.1                                         |

**Table S10** Comparative literature study of **ABH** with other chemosensors

| Sl. no | Analytes detected | Sensor | LOD | Logic gate ensemble | Device fabrication | Aqueous phase 'Naked eye' detection | Removal of targeted analyte | Ref. |
|--------|-------------------|--------|-----|---------------------|--------------------|-------------------------------------|-----------------------------|------|
|--------|-------------------|--------|-----|---------------------|--------------------|-------------------------------------|-----------------------------|------|

|     |                                                                                                                              |                                                                            |                    |   |     |     |   |    |
|-----|------------------------------------------------------------------------------------------------------------------------------|----------------------------------------------------------------------------|--------------------|---|-----|-----|---|----|
| 1.  | As <sup>5+</sup>                                                                                                             | Polypyrrole-chitosan-cobalt ferrite nanoparticles                          | 1ppb               | - | -   | Yes | - | 31 |
| 2.  | Al <sup>3+</sup> ,<br>Fe <sup>3+</sup> ,<br>Cr <sup>3+</sup> ,<br>As <sup>3+</sup> ,<br>In <sup>3+</sup><br>Ga <sup>3+</sup> | Thiourea based probe                                                       | .01ppb             | - | -   | Yes | - | 32 |
| 3.  | As <sup>3+</sup>                                                                                                             | Graphite pencil electrode modified with tin oxide nanoneedles              | 10 ppb             | - | -   | -   | - | 33 |
| 4.  | As <sup>3+</sup> ,<br>As <sup>5+</sup>                                                                                       | semi-automated portable sensor device                                      | 3ppb               | - | Yes | Yes | - | 34 |
| 5.  | As <sup>3+</sup><br>As <sup>5+</sup>                                                                                         | Benzothiazole functionalized Schiff Base probe                             | 7.2 ppb<br>6.7 ppb | - | Yes | Yes | - | 35 |
| 6.  | As <sup>3+</sup>                                                                                                             | Coumarin based probe                                                       | 0.24 ppb           | - | -   | -   | - | 36 |
| 7.  | As <sup>3+</sup>                                                                                                             | Au-NP based Colorimetric and Ultrasensitive Dynamic Light Scattering Assay | 3ppb               | - | -   | Yes | - | 37 |
| 8.  | As <sup>5+</sup>                                                                                                             | Bimetallic Nanoparticles based probe                                       | 1.2 ppb            | - | -   | Yes | - | 7  |
| 9.  | As <sup>3+</sup>                                                                                                             | SERS based Glutathione Functionalized Silver Nanoparticle                  | 0.76 ppb           | - | -   | Yes | - | 38 |
| 10. | As <sup>3+</sup>                                                                                                             | Cationic polymers and aptamers mediated                                    | 5.3 ppb            | - | -   | Yes | - | 39 |

|            |                        |                                                   |         |                                                                                                                         |                                                                              |                                                             |                                                           |            |
|------------|------------------------|---------------------------------------------------|---------|-------------------------------------------------------------------------------------------------------------------------|------------------------------------------------------------------------------|-------------------------------------------------------------|-----------------------------------------------------------|------------|
|            |                        | aggregated gold nanoparticles                     |         |                                                                                                                         |                                                                              |                                                             |                                                           |            |
| <b>11.</b> | <b>As<sup>3+</sup></b> | Benzothiazole functionalized Schiff base molecule | 5.4 ppb | Yes [ABH... As <sup>3+</sup> exhibits ~5 times selective reversibility with F <sup>-</sup> : Fabrication of logic-gate] | Yes [Bluetooth operated RGB based portable smartphone ensembled POCT device] | Yes [Aqueous phase chromomeric semi quantitative detection] | Yes [Metal complex based mitigation of As <sup>3+</sup> ] | <b>ABH</b> |
